# Supplementary material for: Tandem indium oxide–boron nitride catalysts for oxidative dehydrogenation of propane
Source: Royal Society of Chemistry journal article supplement (doi:10.1039/d4cc05577b), 2024-01-01
Supplement: d4cc05577b1.pdf [file d4cc05577b1.pdf]

## Electronic Supporting Information (ESI)

for

### **Tandem Indium Oxide-Boron Nitride Catalysts for Oxidative Dehydrogenation of Propane**

Lei Cao,<sup>a</sup> Peng Xu,<sup>b</sup> Guohui Zhong,<sup>a</sup> Yifan Wu,<sup>a</sup> Sheng Wen,<sup>c</sup> Rongliang  
Shang,<sup>a</sup> Yixiao Liu,<sup>a</sup> Pengcheng Dai,<sup>b,\*</sup> Jin Xie<sup>a,\*</sup>

<sup>a</sup>*School of Physical Science and Technology & Shanghai Key Laboratory of  
High-resolution Electron Microscopy, ShanghaiTech University, Shanghai,  
201210, China. E-mail: [xiejin@shanghaitech.edu.cn](mailto:xiejin@shanghaitech.edu.cn)*

<sup>b</sup>*College of New Energy, State Key Laboratory of Heavy Oil Processing,  
China University of Petroleum (East China), Qingdao 266580, China. E-mail:  
[dpcapple@upc.edu.cn](mailto:dpcapple@upc.edu.cn)*

<sup>c</sup>*College of Engineering and Applied Sciences, Nanjing University, Nanjing,  
210093, China.*

## **Table of contents**

### **1. Experimental Section**

Fabrication of  $x\text{In}_2\text{O}_3\text{-BN}$  catalyst.

General procedure for oxidation dehydrogenation of propane.

Equations.

Characterization.

### **2. Supplementary Figures and Tables**

Figure S1-S17

Table S1-S2

## 1. Experimental Procedures

### 1.1 Fabrication of $x\text{In}_2\text{O}_3\text{-BN}$ catalyst

In a typical deposition process,  $\text{In}_2\text{O}_3$  atomic clusters were formed at 150 °C, Cyclopentadienyl indium (InCp) used as the indium precursor, was heated to 90 °C. Water vapor and plasma oxygen were introduced into the ALD chamber to remove the ligand. A typical deposition cycle included: InCp injection (0.15 s) - exposure (30 s) - argon purging (90 s) - water injection (0.15 s) +  $\text{O}_2$  plasma (20 s) - argon purging (90 s). h-BN with different indium oxide loading was obtained by controlling the ALD cycles, resulting in material named  $x\text{In}_2\text{O}_3\text{-BN}$  (where x indicates the number of ALD cycles).

### 1.2 General procedure for oxidation dehydrogenation of propane

The as-prepared  $x\text{In}_2\text{O}_3\text{-BN}$  catalyst (100 mg) was placed in the middle of the quartz tube (I.D. = 9 mm) and supported by quartz wools. A K-type thermocouple was inserted into the center of the catalyst bed to monitor the operating temperature. The reactant gas mixture, consisting of nitrogen, propane, and oxygen in a 6:1:1 ratio, had a total flow rate of 24 mL  $\text{min}^{-1}$ , controlled by three mass flow controllers. The outlet gas was analyzed by an on-line gas chromatograph (FULI INSTRUMENTS, GC9790II) equipped with a HP-PLOT  $\text{Al}_2\text{O}_3$  column (30 m  $\times$  0.53 mm  $\times$  15  $\mu\text{m}$ ), a Porapak Q packed column (2 m  $\times$  3 mm) and 5A molecular sieve

column (2 m × 4 mm). A flame ionization detector (FID) was used for detecting of CH<sub>4</sub>, C<sub>2</sub>H<sub>6</sub>, C<sub>2</sub>H<sub>4</sub>, C<sub>3</sub>H<sub>8</sub> and C<sub>3</sub>H<sub>6</sub>, etc., while CO, CO<sub>2</sub> and CH<sub>4</sub> were detected using a thermal conductivity detector (TCD). Every xCl<sub>2</sub>O<sub>3</sub>-BN catalyst was activated at a propane conversion of ~ 20% for 15 min, after which the reactor was cooled to 460 °C for catalytic evaluation. The reaction temperature was varied in the range of 460 - 560 °C with a ramp of 2 °C min<sup>-1</sup> (reactant gas: N<sub>2</sub>-C<sub>3</sub>H<sub>8</sub>-O<sub>2</sub> = 6-1-1, total flow rate = 24 mL min<sup>-1</sup>, WHSV = 14400 L kg<sub>cat</sub><sup>-1</sup> h<sup>-1</sup>). Such a low reaction gas concentration can avoid the formation of excessive oxygenate, while creating a low water vapor concentration environment. The long-term stability test was performed at the reaction temperature where propane conversion was ~ 15%.

### 1.3 Equations

The propane conversion, product selectivity, yield and carbon balance were calculated as follows:

$$\text{Propane conversion} = \frac{\text{C mol of } (C_3H_{8,IN} - C_3H_{8,OUT})}{\text{C mol of } C_3H_{8,IN}} \times 100\%$$

$$\text{Product selectivity} = \frac{\text{C mol of specific product}}{\text{C mol of } (C_3H_{8,IN} - C_3H_{8,OUT})} \times 100\%$$

$$\text{Product yield} = (\text{Propane conversion} \times \text{Product selectivity}) \times 100\%$$

$$\text{Carbon Balance} = \frac{\text{C mol of (products} + C_3H_{8,OUT})}{\text{C mol of } C_3H_{8,IN}} \times 100\%$$

where C mol refers to the number of carbon moles in the products, inlet and outlet of the propane.

#### *1.4 Catalysts Characterization*

Transmission electron microscopy (TEM), including high-resolution transmission electron microscopy (HRTEM) was obtained using a JEM F200 Electron Microscope operated at 200 kV. Thermal gravimetric (TG) analysis was performed on a thermal analyzer (Netzsch TG/209F3). Powder X-ray diffraction (PXRD) patterns were collected on a Bruker D8 X-ray diffractometer with Cu K $\alpha$  radiation at room temperature. The Fourier transform infrared (FT-IR) spectra of the samples were recorded on a Bruker 4700 FT-IR spectrometer (Bruker Optics Inc., Ettlingen, Germany). X-ray photoelectron spectroscopy (XPS) spectra were collected on an ESCALAB 250Xi X-ray photoelectron spectrometer. Inductively coupled plasma optical emission spectrometer was performed on an Agilent ICPOES 720. Nitrogen physisorption isotherms were recorded at 77 K using a Quantachrome Autosorb-iQ nitrogen volumetric adsorption instrument. Before measurement, the catalysts were degassed at 120 °C for 8 h. The scanning transmission electron microscopy (STEM), energy-dispersive X-ray spectroscopy (EDS), and electron energy loss spectroscopy (EELS) elemental mapping and spectra were collected on a JEOL Grand ARM-300F, operate at 300 kV with a Gatan Oneview camera and a K2 summit direct electron counting detector. Non-local density

functional theory (NLDFT) calculations were performed to obtain the pore size distribution based on the measured N<sub>2</sub> adsorption isotherms.

## 2. Supplementary Figures and Tables

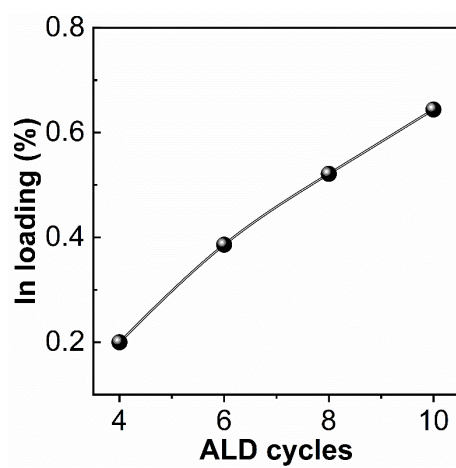

**Fig. S1** Indium loadings in  $x\text{cln}_2\text{O}_3\text{-BN}$  with different ALD deposited cycles determined by ICP-OES.

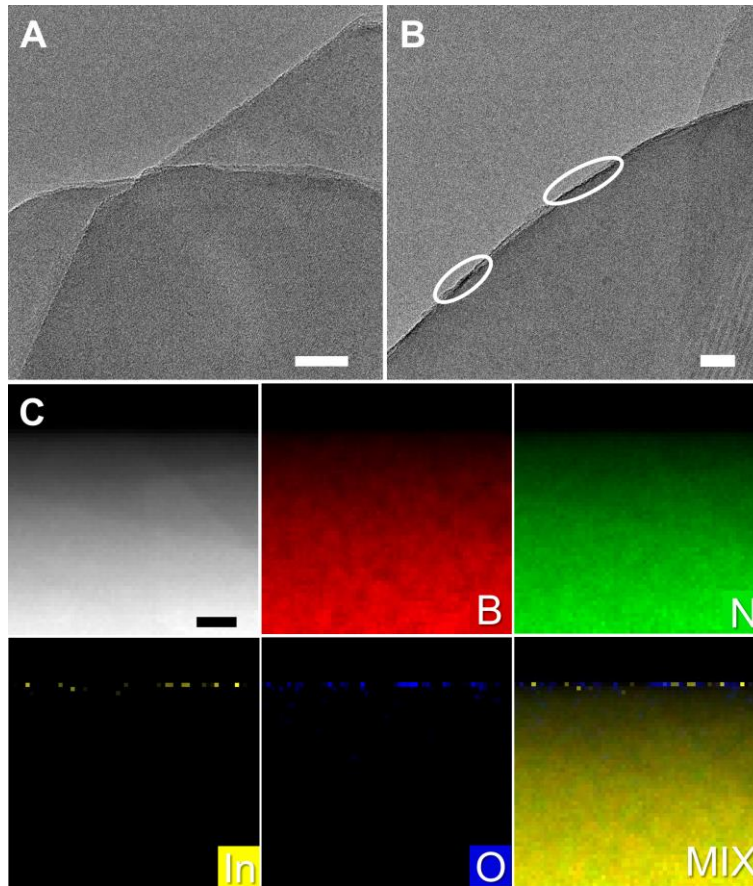

**Fig. S2** TEM images of fresh BN (A) and 8cln<sub>2</sub>O<sub>3</sub>-BN (B) catalysts. Scale bars: 20 nm. (C) STEM image and corresponding EELS elemental mapping of fresh 4cln<sub>2</sub>O<sub>3</sub>-BN catalyst, high-lighting the distribution of key elements. Scale bars: 10 nm.



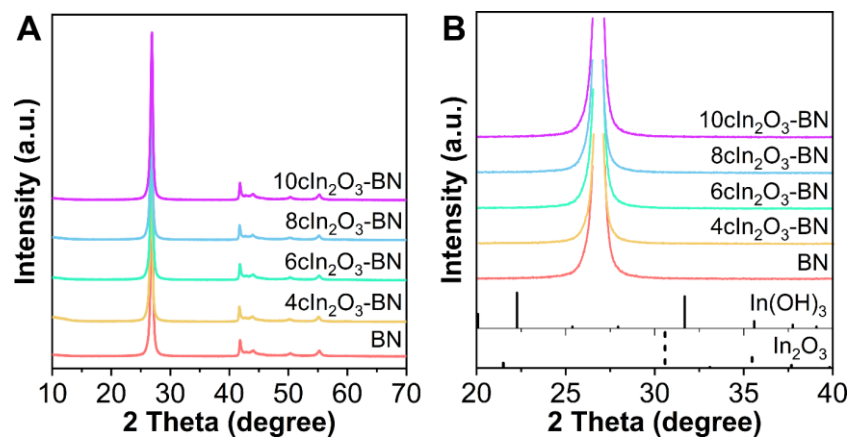

**Fig. S3** XRD patterns of fresh  $x\text{In}_2\text{O}_3\text{-BN}$  composite catalysts.

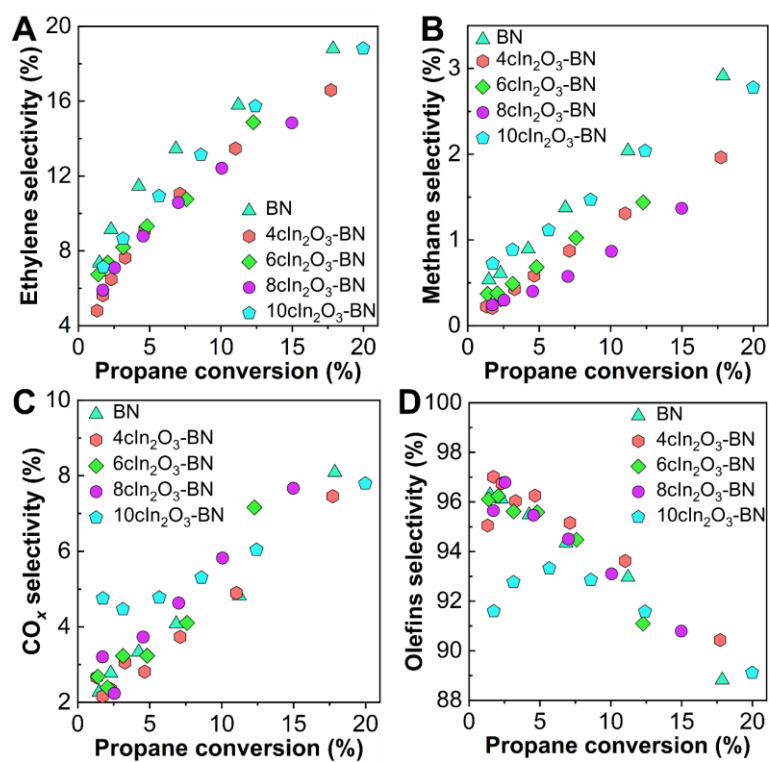

**Fig. S4** Olefins selectivity and ethylene selectivity as a function of propane conversion over BN and  $x\text{Cl}_2\text{O}_3\text{-BN}$  catalysts.

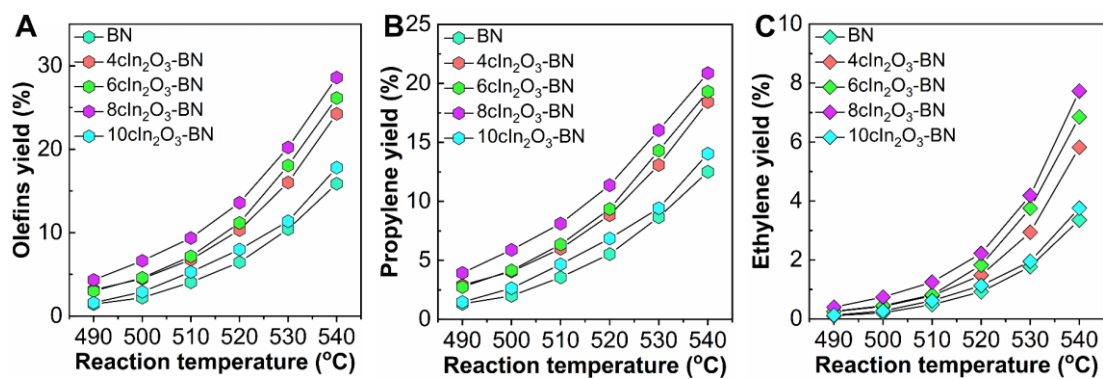

**Fig. S5** Olefins, propylene, and ethylene yield as a function of reaction temperature over pristine BN and  $x\text{In}_2\text{O}_3\text{-BN}$  catalysts.

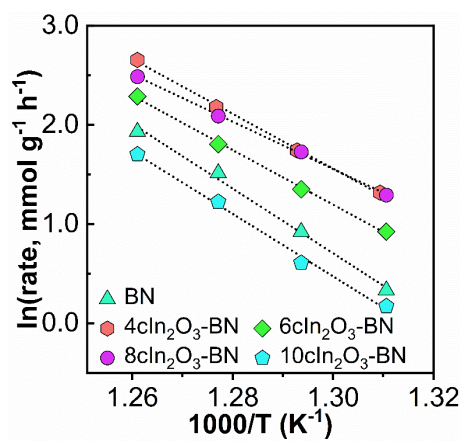

**Fig. S6** Reaction rate as a function of reaction temperature over pristine BN and  $x\text{In}_2\text{O}_3\text{-BN}$  catalysts.

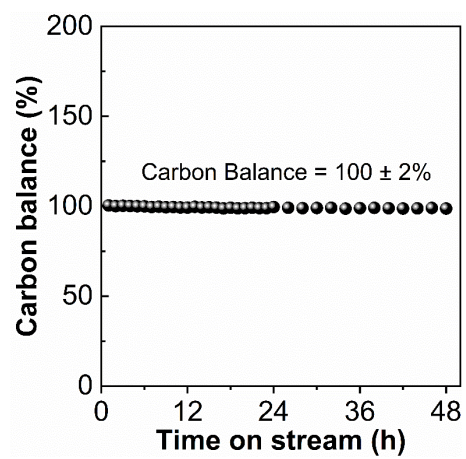

**Fig. S7** Carbon balance during the long-term stability test.

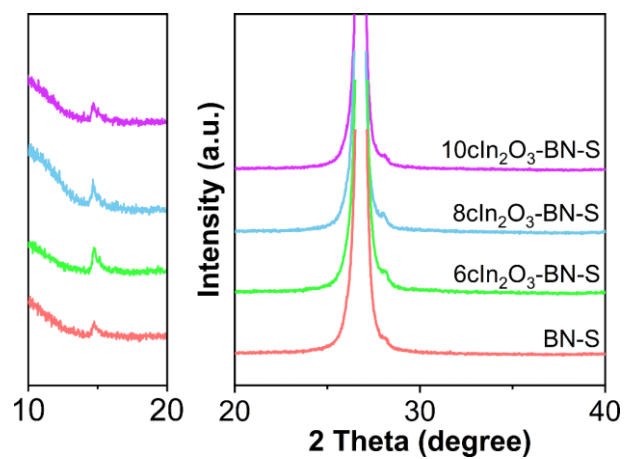

**Fig. S8** XRD patterns of spent BN and  $x\text{In}_2\text{O}_3\text{-BN}$  composite catalysts.

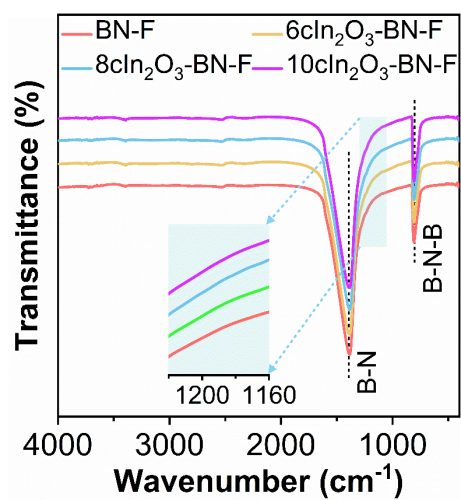

**Fig. S9** FT-IR spectra of fresh  $x\text{In}_2\text{O}_3\text{-BN}$  ( $x\text{In}_2\text{O}_3\text{-BN-F}$ ) and BN (BN-F) catalysts.

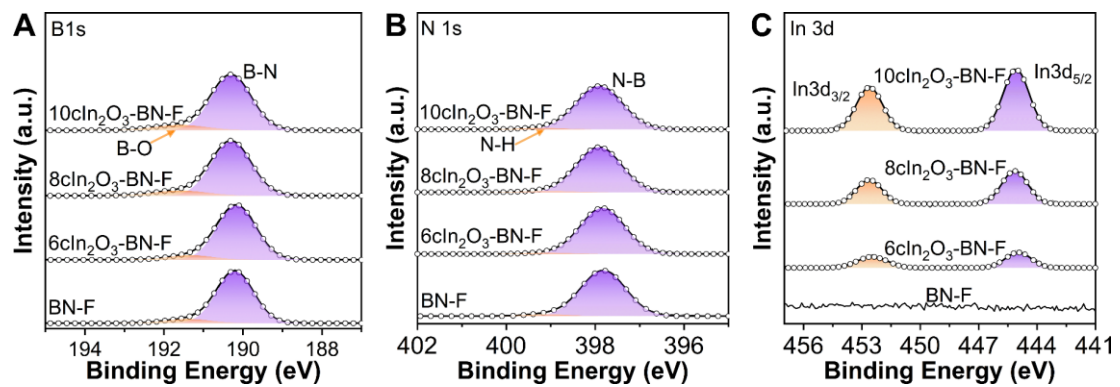

**Fig. S10** XPS spectra of B 1s (a), N 1s (b), and In 3d (c) from fresh  $x\text{In}_2\text{O}_3$ -BN catalysts.



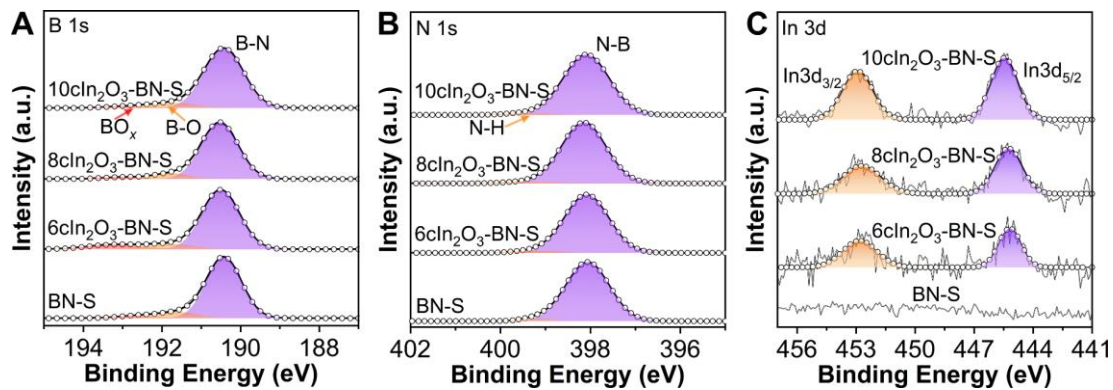

**Fig. S11** XPS spectra of B 1s (a), N 1s (b), and In 3d (c) from spent  $x\text{In}_2\text{O}_3$ -BN catalysts.

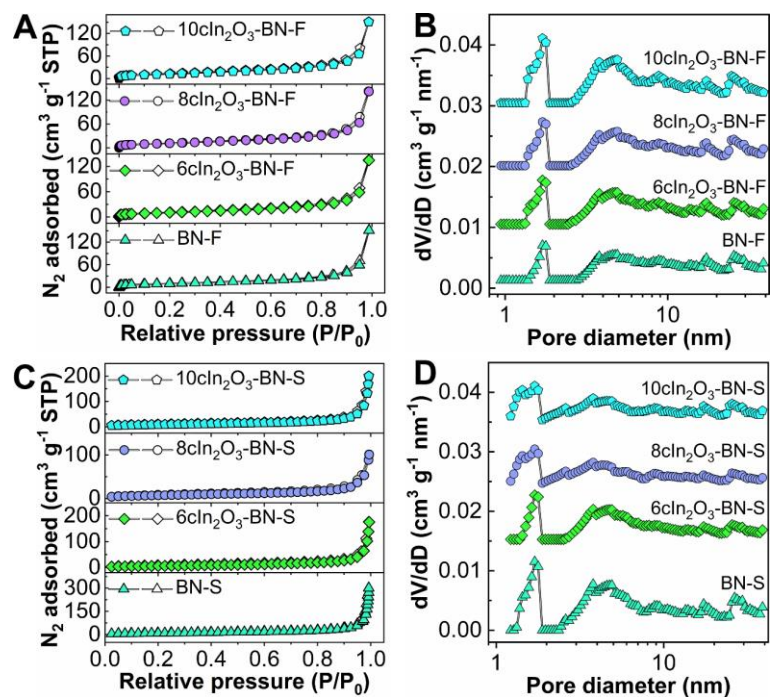

**Fig. S12** Nitrogen adsorption-desorption isotherm and corresponding pore distribution of fresh (a-b) and spent (c-d)  $x\text{ClN}_2\text{O}_3\text{-BN}$  catalysts.

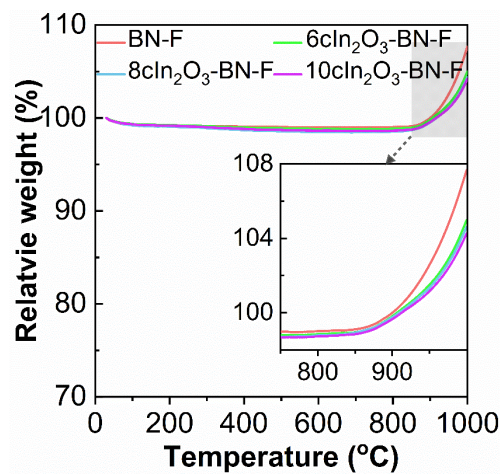

**Fig. S13** TGA curves of fresh  $x\text{In}_2\text{O}_3\text{-BN}$  catalysts.

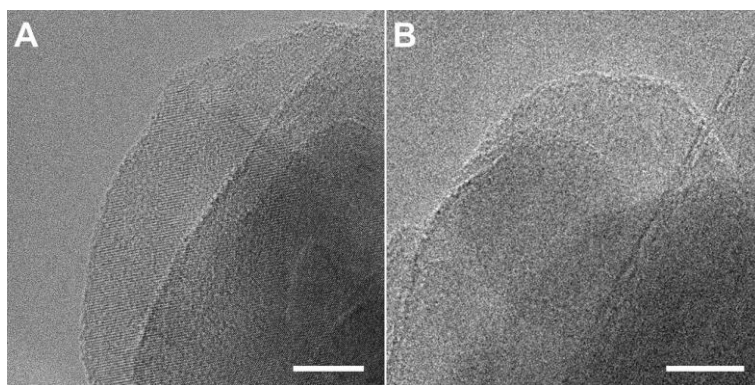

**Fig. S14** TEM images of spent BN catalysts, scale bars: 10 nm.

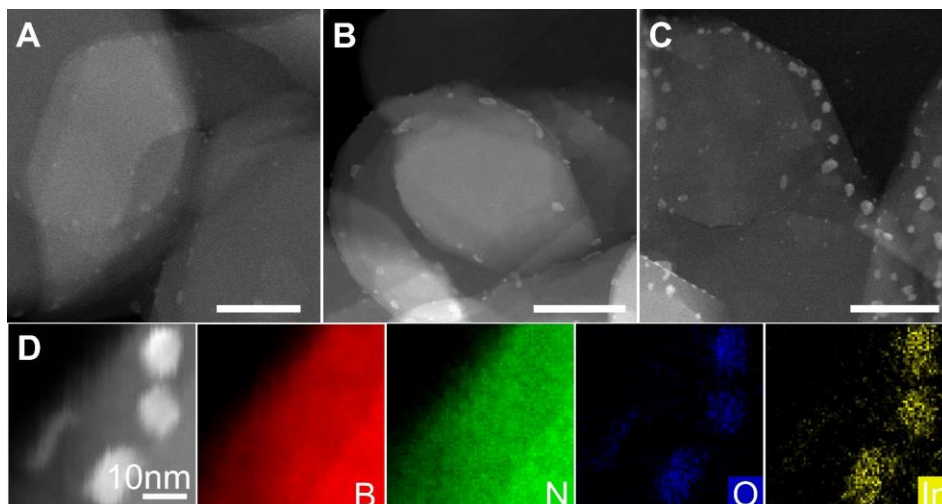

**Fig. S15** STEM images of spent 6 $\text{In}_2\text{O}_3$ -BN (a), 8 $\text{In}_2\text{O}_3$ -BN (b), and 10 $\text{In}_2\text{O}_3$ -BN (c) catalysts. scale bars: 100 nm. STEM images of 10 $\text{In}_2\text{O}_3$ -BN and corresponding EELS elemental mappings (d).

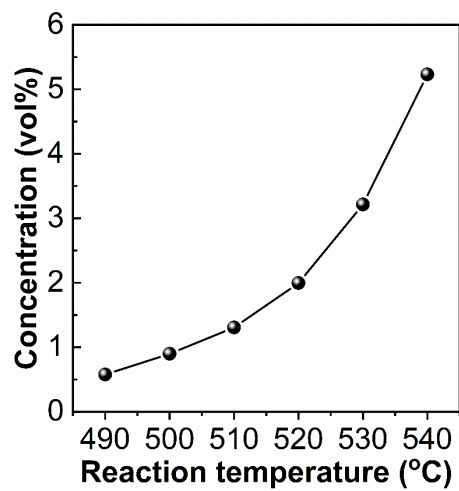

**Fig. S16** Water vapor concentration as a function of reaction temperature.

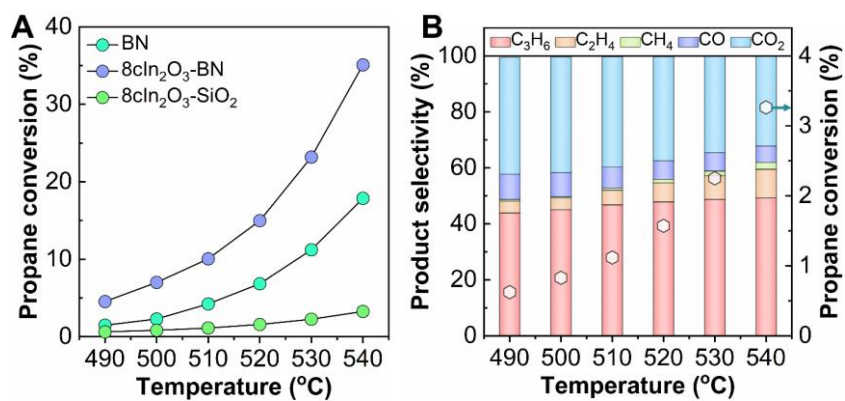

**Fig. S17** (a) Comparison of catalytic performance of BN, 8ClIn<sub>2</sub>O<sub>3</sub>-BN, and 8ClIn<sub>2</sub>O<sub>3</sub>-SiO<sub>2</sub>. (b) Product selectivity and propane conversion over 8ClIn<sub>2</sub>O<sub>3</sub>-SiO<sub>2</sub> catalyst as a function of reaction temperature.

**Table S1.** Comparison of apparent activation energy ( $E_a$ ) between pristine BN and various  $x\text{In}_2\text{O}_3$ -BN catalysts.

| Catalysts                            | $E_a$ (kJ mol <sup>-1</sup> ) | $R^2$ |
|--------------------------------------|-------------------------------|-------|
| p-BN                                 | 271.1±1.6                     | 0.995 |
| 4In <sub>2</sub> O <sub>3</sub> -BN  | 229.5±5.3                     | 0.998 |
| 6In <sub>2</sub> O <sub>3</sub> -BN  | 228.6±6.6                     | 0.998 |
| 8In <sub>2</sub> O <sub>3</sub> -BN  | 197.8±3.2                     | 0.999 |
| 10In <sub>2</sub> O <sub>3</sub> -BN | 261.9±1.3                     | 0.997 |



**Table S2.** The amount of  $\text{BO}_x$  species of fresh and spent BN and  $8\text{cIn}_2\text{O}_3$ -BN catalysts.

| <b>Catalysts</b> | <b>BN</b> | <b><math>8\text{cIn}_2\text{O}_3</math>-BN</b> |
|------------------|-----------|------------------------------------------------|
| Fresh            | 7.9%      | 2.9%                                           |
| Spent            | 3.9%      | 3.1%                                           |

**Table S3.** Brunauer-Emmett-Teller (BET) surface area and pore volumes of fresh and spent BN and  $x\text{In}_2\text{O}_3\text{-BN}$  catalysts.

| <b>Catalysts</b>                          | <b>BET surface area<br/>(<math>\text{m}^2 \text{g}^{-1}</math>)</b> | <b>Pore volume<br/>(<math>\text{cm}^3 \text{g}^{-1}</math>)</b> |
|-------------------------------------------|---------------------------------------------------------------------|-----------------------------------------------------------------|
| Fresh BN                                  | 35.7                                                                | 0.12                                                            |
| Spent BN                                  | 52.8                                                                | 0.18                                                            |
| Fresh $6\text{In}_2\text{O}_3\text{-BN}$  | 38.0                                                                | 0.12                                                            |
| Spent $6\text{In}_2\text{O}_3\text{-BN}$  | 23.5                                                                | 0.09                                                            |
| Fresh $8\text{In}_2\text{O}_3\text{-BN}$  | 42.2                                                                | 0.14                                                            |
| Spent $8\text{In}_2\text{O}_3\text{-BN}$  | 34.9                                                                | 0.11                                                            |
| Fresh $10\text{In}_2\text{O}_3\text{-BN}$ | 45.7                                                                | 0.12                                                            |
| Spent $10\text{In}_2\text{O}_3\text{-BN}$ | 27.3                                                                | 0.07                                                            |
